# Supplementary material for: The Evolution of Sex Ratio Distorter Suppression Affects a 25 cM Genomic Region in the Butterfly Hypolimnas bolina
Source: PLoS Genet. 2014 Dec 4;10(12):e1004822. doi: 10.1371/journal.pgen.1004822 (PMC4256269; doi:10.1371/journal.pgen.1004822)
Supplement: S6 Table — Data generated for linkage mapping. Data for 307 daughters of the male-informative cross in the format required for Joinmap. (XLSX) [file pgen.1004822.s009.xlsx]

## Sheet: Sheet1
	Suppressor Linkage Group marker loci
Sample	A	B	C	D	E	F	G	H	I	J	K	L
D1	nn	nn	nn	nn	nn	nn	nn	nn	nn	--	nn	nn
D2	nn	nn	nn	nn	nn	nn	nn	nn	nn	--	np	np
D3	nn	nn	nn	nn	nn	nn	nn	nn	nn	--	nn	nn
D4	np	np	np	np	np	np	np	np	np	--	np	np
D5	np	nn	nn	nn	nn	nn	nn	nn	nn	--	nn	nn
D6	nn	nn	nn	nn	nn	nn	nn	nn	nn	--	nn	nn
D7	np	np	np	np	np	np	np	np	np	--	np	np
D8	np	--	np	np	np	np	np	np	np	--	np	np
D9	np	np	np	np	np	np	np	np	np	--	np	nn
D10	nn	nn	nn	nn	nn	nn	nn	nn	nn	--	nn	nn
D11	nn	nn	nn	nn	nn	nn	nn	nn	nn	--	nn	nn
D12	nn	nn	--	nn	nn	nn	nn	--	--	--	--	--
D13	nn	nn	nn	nn	nn	nn	nn	nn	nn	--	nn	nn
D14	np	np	np	np	np	np	np	np	np	--	np	np
D15	nn	nn	nn	nn	nn	nn	nn	nn	nn	--	nn	nn
D16	nn	nn	nn	nn	nn	nn	nn	nn	nn	--	nn	nn
D17	np	np	np	np	np	np	np	np	np	--	np	nn
D18	nn	nn	nn	nn	nn	nn	nn	nn	nn	--	nn	nn
D19	nn	nn	nn	nn	nn	nn	nn	nn	nn	--	nn	nn
D20	nn	--	nn	nn	nn	nn	nn	nn	nn	--	nn	nn
D21	nn	nn	nn	nn	nn	nn	nn	nn	nn	--	nn	nn
D22	nn	nn	nn	nn	nn	nn	nn	nn	nn	--	nn	nn
D23	nn	nn	nn	nn	nn	nn	nn	nn	nn	--	nn	nn
D24	nn	nn	nn	nn	nn	nn	nn	nn	nn	--	nn	np
D25	nn	nn	nn	nn	nn	nn	nn	nn	nn	--	nn	nn
D26	nn	nn	nn	nn	nn	nn	np	np	np	--	np	np
D27	np	np	np	np	np	np	np	np	np	--	np	np
D28	nn	nn	nn	nn	nn	nn	nn	nn	nn	--	nn	nn
D29	np	np	np	np	np	np	np	np	np	--	np	np
D30	nn	nn	nn	nn	nn	nn	nn	nn	nn	--	nn	np
D31	nn	nn	nn	nn	nn	nn	nn	nn	nn	--	nn	np
D32	nn	nn	nn	nn	nn	nn	nn	nn	nn	--	nn	nn
D33	nn	nn	nn	nn	nn	nn	nn	nn	nn	--	nn	nn
D34	np	np	np	np	np	np	np	np	np	--	np	np
D35	nn	nn	nn	nn	nn	nn	nn	nn	nn	--	nn	nn
D36	np	np	np	np	np	np	np	np	np	--	np	nn
D37	nn	nn	nn	nn	nn	nn	nn	nn	nn	--	nn	np
D38	nn	nn	nn	nn	nn	nn	nn	nn	nn	--	nn	nn
D39	nn	nn	nn	nn	nn	nn	nn	nn	nn	--	nn	nn
D40	nn	nn	nn	nn	nn	nn	nn	nn	nn	--	nn	nn
D41	nn	nn	nn	nn	nn	nn	nn	nn	nn	--	nn	nn
D42	nn	nn	nn	nn	nn	nn	nn	nn	nn	--	nn	nn
D43	np	np	np	np	np	np	np	np	np	--	np	np
D44	nn	nn	nn	nn	nn	nn	nn	nn	nn	--	nn	nn
D45	np	np	np	np	np	np	np	np	np	--	np	np
D46	nn	nn	nn	nn	nn	nn	nn	nn	nn	--	nn	nn
D47	nn	nn	nn	nn	nn	nn	nn	nn	nn	--	nn	nn
D48	np	np	np	np	np	np	np	np	np	--	np	np
D49	np	np	np	np	np	np	np	np	np	--	np	nn
D50	nn	nn	nn	nn	nn	nn	nn	nn	nn	--	nn	nn
D51	nn	nn	nn	nn	nn	nn	nn	nn	nn	--	nn	nn
D52	np	np	np	np	np	np	np	np	np	--	nn	nn
D53	np	np	np	np	np	np	np	np	np	--	np	np
D54	nn	nn	nn	nn	nn	nn	nn	nn	nn	--	nn	nn
D55	np	np	np	np	np	np	np	np	np	--	np	np
D56	nn	nn	nn	nn	nn	nn	nn	nn	nn	--	nn	nn
D57	nn	nn	nn	nn	nn	nn	nn	nn	nn	--	nn	np
D58	np	np	nn	nn	nn	nn	nn	nn	nn	--	nn	nn
D59	np	np	np	np	np	np	nn	nn	nn	--	nn	nn
D60	nn	nn	nn	nn	nn	nn	nn	nn	nn	--	nn	--
D61	nn	nn	nn	nn	nn	nn	nn	nn	nn	--	nn	--
D62	nn	nn	nn	nn	nn	nn	nn	nn	nn	--	nn	nn
D63	np	np	np	np	np	np	np	np	nn	--	np	--
D64	nn	nn	nn	nn	nn	nn	nn	nn	nn	--	np	np
D65	nn	nn	nn	nn	nn	nn	nn	nn	nn	--	nn	--
D66	nn	nn	nn	nn	nn	nn	nn	nn	nn	--	nn	--
D67	nn	nn	nn	nn	nn	nn	nn	nn	nn	--	nn	nn
D68	nn	nn	nn	nn	nn	nn	nn	nn	nn	--	np	np
D69	nn	nn	nn	nn	nn	nn	nn	nn	nn	--	np	np
D70	nn	nn	nn	nn	nn	nn	nn	nn	nn	--	nn	nn
D71	nn	nn	nn	nn	nn	nn	nn	nn	nn	--	nn	--
D72	nn	nn	nn	nn	nn	nn	nn	nn	nn	--	nn	nn
D73	np	np	np	np	np	np	np	np	np	--	np	np
D74	np	np	np	np	np	np	np	np	np	--	nn	--
D75	nn	nn	nn	nn	nn	nn	nn	nn	nn	--	nn	--
D76	nn	nn	nn	np	np	np	np	np	np	--	np	np
D77	nn	nn	nn	nn	nn	nn	nn	nn	nn	--	nn	np
D78	np	np	np	np	np	np	np	np	np	--	np	np
D79	nn	nn	nn	nn	nn	nn	nn	nn	nn	--	np	np
D80	np	np	np	np	np	np	np	np	np	--	nn	nn
D81	np	np	np	np	np	np	np	np	np	--	np	np
D82	np	np	np	np	np	np	np	np	np	--	np	np
D83	np	np	np	np	np	np	np	np	np	--	np	nn
D84	nn	np	np	nn	nn	nn	nn	nn	nn	--	nn	nn
D85	nn	nn	nn	nn	nn	nn	nn	nn	nn	--	np	np
D86	nn	nn	nn	nn	nn	nn	nn	nn	nn	--	nn	nn
D87	np	np	np	nn	nn	nn	nn	nn	nn	--	nn	nn
D88	nn	--	nn	nn	nn	nn	nn	nn	nn	--	nn	nn
D89	np	np	np	np	np	np	np	np	np	--	np	np
D90	np	np	np	np	np	np	np	np	np	--	np	np
D91	np	np	np	np	np	np	--	np	np	--	np	np
D92	nn	nn	nn	nn	nn	nn	nn	nn	nn	--	nn	nn
D93	nn	nn	nn	nn	nn	nn	nn	nn	nn	--	nn	np
D94	np	np	np	np	np	np	np	np	np	--	np	nn
D95	np	np	np	np	np	np	np	np	np	--	np	np
D96	nn	--	np	np	np	np	np	np	np	--	np	np
D97	np	np	np	np	np	np	np	np	np	--	np	np
D98	nn	nn	nn	nn	nn	nn	nn	nn	nn	--	nn	nn
D99	np	np	np	np	np	np	np	np	np	np	np	nn
D100	np	np	np	np	np	np	np	np	np	np	np	np
D101	nn	nn	nn	nn	nn	nn	nn	nn	nn	nn	nn	nn
D102	np	np	np	np	np	np	nn	nn	nn	nn	nn	nn
D103	nn	nn	nn	nn	nn	nn	nn	nn	nn	nn	nn	np
D104	nn	nn	nn	nn	nn	nn	nn	nn	nn	nn	nn	nn
D105	np	np	np	np	np	np	np	np	np	np	np	np
D106	nn	nn	nn	nn	nn	nn	nn	nn	nn	nn	np	np
D107	nn	nn	nn	nn	nn	nn	nn	nn	nn	nn	nn	nn
D108	nn	nn	nn	nn	nn	nn	nn	nn	nn	nn	nn	nn
D109	np	nn	nn	nn	nn	nn	nn	nn	nn	nn	nn	nn
D110	nn	nn	nn	nn	nn	nn	nn	nn	nn	nn	nn	nn
D111	np	np	np	np	np	np	np	np	np	np	np	np
D112	nn	nn	nn	nn	nn	nn	nn	nn	nn	nn	nn	np
D113	nn	nn	nn	nn	nn	nn	nn	nn	nn	nn	nn	nn
D114	nn	nn	nn	nn	nn	nn	nn	nn	nn	nn	nn	nn
D115	np	np	np	np	np	np	nn	nn	nn	nn	nn	nn
D116	np	np	np	np	np	np	np	np	np	np	np	nn
D117	np	np	np	np	np	np	np	np	np	np	np	np
D118	nn	nn	nn	nn	nn	nn	nn	nn	nn	nn	nn	nn
D119	nn	nn	nn	nn	nn	nn	nn	nn	nn	nn	nn	nn
D120	nn	nn	nn	nn	nn	nn	nn	nn	nn	nn	nn	nn
D121	nn	np	np	np	np	np	np	np	np	np	np	np
D122	nn	nn	nn	nn	nn	nn	nn	nn	nn	nn	nn	np
D123	np	np	np	np	np	np	np	np	np	np	np	nn
D124	nn	nn	nn	nn	nn	nn	nn	nn	nn	nn	nn	nn
D125	nn	nn	nn	nn	nn	nn	nn	nn	nn	nn	nn	nn
D126	np	np	np	np	np	np	np	np	np	np	np	np
D127	nn	nn	np	np	np	np	np	np	np	np	np	np
D128	np	np	np	np	np	np	nn	nn	nn	nn	nn	nn
D129	np	np	nn	nn	nn	nn	nn	nn	nn	nn	nn	nn
D130	nn	nn	np	np	np	np	np	np	np	np	np	np
D131	nn	nn	nn	nn	nn	nn	nn	nn	nn	nn	nn	nn
D132	nn	nn	nn	nn	nn	nn	nn	nn	nn	nn	nn	nn
D133	nn	nn	nn	nn	nn	nn	nn	nn	nn	nn	nn	np
D134	np	np	np	np	np	np	np	np	np	np	np	nn
D135	np	np	np	np	np	np	np	np	np	np	np	np
D136	np	np	np	np	np	np	np	np	np	np	np	nn
D137	np	np	np	np	np	np	np	np	np	np	np	np
D138	nn	nn	nn	nn	nn	nn	nn	nn	nn	nn	nn	nn
D139	nn	nn	nn	nn	nn	nn	np	np	np	np	np	np
D140	nn	nn	nn	nn	nn	nn	nn	nn	nn	nn	nn	nn
D141	nn	nn	nn	nn	nn	nn	nn	nn	nn	nn	nn	--
D142	np	np	np	np	np	np	np	np	np	np	np	--
D143	nn	nn	nn	nn	nn	nn	nn	nn	nn	nn	nn	--
D144	nn	nn	nn	nn	nn	nn	nn	nn	nn	nn	nn	nn
D145	nn	nn	nn	nn	nn	nn	nn	nn	nn	nn	nn	--
D146	nn	nn	nn	np	np	np	np	np	np	np	np	--
D147	np	np	np	np	np	np	nn	nn	nn	nn	nn	nn
D148	nn	nn	nn	nn	nn	nn	nn	nn	nn	nn	nn	nn
D149	nn	nn	nn	nn	nn	nn	nn	nn	nn	--	--	--
D150	np	np	nn	nn	nn	nn	nn	nn	nn	nn	nn	nn
D151	nn	nn	nn	nn	nn	nn	nn	nn	nn	nn	nn	nn
D152	np	np	np	np	np	np	np	np	np	np	np	nn
D153	np	np	np	np	np	np	np	np	np	np	np	np
D154	np	nn	np	np	np	np	np	np	np	np	np	np
D155	np	nn	nn	nn	nn	nn	nn	nn	nn	nn	nn	nn
D156	nn	nn	nn	nn	nn	nn	nn	nn	nn	nn	nn	nn
D157	nn	nn	nn	nn	nn	nn	nn	nn	nn	nn	np	np
D158	np	np	np	np	np	np	np	np	np	np	np	np
D159	nn	nn	nn	nn	nn	nn	np	np	np	np	np	np
D160	np	np	np	np	np	np	np	np	np	np	np	np
D161	np	np	np	np	np	np	np	np	np	np	np	np
D162	nn	np	np	np	np	np	np	np	np	np	np	np
D163	nn	nn	nn	nn	nn	nn	np	np	np	np	np	np
D164	--	nn	nn	nn	nn	nn	nn	nn	nn	nn	nn	nn
D165	np	np	np	np	np	np	np	np	np	np	np	nn
D166	nn	nn	nn	nn	nn	nn	nn	nn	nn	nn	nn	nn
D167	nn	nn	nn	nn	nn	nn	nn	nn	nn	nn	nn	nn
D168	np	np	np	np	np	np	np	np	np	np	np	np
D169	--	nn	nn	nn	nn	nn	nn	nn	nn	nn	np	np
D170	--	nn	nn	np	np	np	np	np	np	np	np	np
D171	np	np	np	nn	nn	nn	nn	nn	nn	nn	nn	nn
D172	nn	nn	nn	nn	nn	nn	nn	nn	nn	nn	nn	nn
D173	np	np	np	np	np	np	np	np	np	np	np	nn
D174	nn	nn	nn	nn	nn	nn	nn	nn	nn	nn	nn	nn
D175	np	np	np	np	np	np	np	np	np	np	np	np
D176	np	np	np	np	np	np	np	np	np	np	np	np
D177	np	nn	nn	nn	nn	nn	np	np	np	np	np	np
D178	--	np	np	np	np	np	np	np	np	np	np	np
D179	--	np	np	np	np	np	np	np	np	np	np	np
D180	--	nn	nn	nn	nn	nn	nn	nn	nn	nn	nn	nn
D181	np	np	np	np	np	np	nn	nn	nn	nn	nn	nn
D182	np	nn	nn	nn	nn	nn	nn	nn	nn	nn	nn	nn
D183	nn	nn	nn	nn	nn	nn	nn	nn	nn	nn	nn	nn
D184	np	nn	nn	nn	nn	nn	nn	nn	nn	nn	nn	nn
D185	np	np	np	np	np	np	--	np	np	np	np	nn
D186	np	np	np	np	np	np	np	np	np	np	np	np
D187	nn	nn	nn	nn	nn	nn	nn	nn	nn	nn	np	np
D188	np	nn	nn	nn	nn	nn	nn	nn	nn	nn	np	np
D189	np	np	np	np	np	np	np	np	np	np	np	nn
D190	nn	nn	nn	nn	nn	nn	nn	nn	nn	nn	nn	nn
D191	np	nn	nn	nn	nn	nn	nn	nn	nn	nn	nn	nn
D192	nn	nn	nn	nn	nn	nn	nn	nn	nn	nn	nn	nn
D193	nn	nn	nn	nn	nn	nn	nn	nn	nn	nn	nn	nn
D194	nn	nn	nn	nn	nn	nn	nn	nn	nn	--	nn	np
D195	nn	nn	nn	nn	nn	nn	nn	nn	nn	nn	nn	nn
D196	nn	np	np	np	np	np	np	np	np	np	np	np
D197	np	np	np	np	np	np	np	np	np	np	np	np
D198	np	np	np	np	np	np	np	np	np	np	np	np
D199	nn	nn	nn	nn	nn	nn	nn	nn	nn	nn	nn	nn
D200	np	np	np	nn	nn	nn	nn	nn	nn	nn	nn	nn
D201	np	np	np	np	np	np	--	np	np	np	nn	nn
D202	np	np	np	np	np	np	np	np	np	np	np	np
D203	np	np	np	np	np	np	np	np	np	np	np	np
D204	nn	nn	nn	nn	nn	nn	nn	nn	nn	nn	nn	nn
D205	nn	nn	nn	nn	nn	nn	nn	nn	nn	nn	nn	nn
D206	np	np	np	np	np	np	np	np	np	np	np	np
D207	nn	np	np	np	np	np	np	np	np	np	np	np
D208	np	np	np	np	np	np	np	np	np	np	np	np
D209	nn	nn	nn	nn	nn	nn	nn	nn	nn	nn	nn	nn
D210	np	np	np	np	np	np	--	np	np	np	np	np
D211	nn	nn	nn	nn	nn	nn	nn	nn	nn	nn	nn	np
D212	np	np	np	np	np	np	np	np	np	np	np	np
D213	np	np	np	np	np	np	np	np	np	np	nn	nn
D214	nn	nn	nn	nn	nn	nn	--	nn	nn	nn	nn	np
D215	nn	nn	nn	nn	nn	nn	nn	nn	nn	nn	nn	nn
D216	np	np	np	np	np	np	np	np	np	np	np	np
D217	np	np	np	np	np	np	np	np	np	np	nn	nn
D218	nn	nn	nn	nn	nn	nn	nn	nn	nn	nn	nn	np
D219	nn	nn	np	np	np	np	np	np	np	np	np	np
D220	--	np	np	np	np	np	np	np	np	np	np	np
D221	nn	--	nn	nn	nn	nn	nn	nn	nn	--	nn	np
D222	nn	--	nn	nn	nn	nn	nn	nn	nn	--	nn	nn
D223	nn	--	nn	nn	nn	nn	nn	nn	nn	--	nn	nn
D224	nn	--	nn	nn	nn	nn	nn	nn	nn	--	np	np
D225	nn	--	nn	nn	nn	nn	nn	nn	nn	--	nn	nn
D226	nn	--	nn	nn	nn	np	np	np	np	--	np	np
D227	nn	--	nn	nn	nn	nn	nn	nn	nn	--	nn	nn
D228	nn	--	nn	nn	nn	nn	nn	nn	nn	--	nn	nn
D229	nn	--	nn	nn	nn	nn	nn	nn	nn	--	nn	nn
D230	nn	--	nn	nn	nn	nn	nn	nn	nn	--	nn	nn
D231	np	--	nn	nn	nn	nn	nn	nn	nn	--	nn	nn
D232	nn	--	nn	nn	nn	nn	nn	nn	nn	--	np	np
D233	nn	--	nn	nn	nn	nn	nn	nn	nn	--	nn	np
D234	nn	--	nn	nn	nn	nn	nn	nn	nn	--	np	np
D235	nn	--	nn	nn	nn	nn	np	np	np	--	np	np
D236	nn	--	nn	nn	nn	nn	nn	nn	nn	--	nn	nn
D237	np	--	np	np	np	np	np	np	np	--	np	np
D238	np	--	np	np	np	np	np	np	np	--	np	np
D239	np	--	np	np	np	np	np	np	np	--	np	np
D240	np	--	np	np	--	--	np	np	np	--	np	nn
D241	nn	--	nn	nn	nn	nn	nn	nn	nn	--	nn	nn
D242	np	--	np	np	np	np	np	np	np	--	np	np
D243	nn	--	nn	nn	nn	nn	nn	nn	nn	--	np	np
D244	np	--	np	nn	nn	nn	nn	nn	nn	--	nn	nn
D245	nn	--	nn	nn	nn	nn	nn	nn	nn	--	nn	np
D246	nn	--	nn	nn	nn	nn	nn	nn	nn	--	nn	nn
D247	np	--	np	np	np	np	np	np	np	--	np	np
D248	nn	--	nn	nn	nn	nn	nn	nn	nn	--	nn	--
D249	np	--	np	np	np	np	np	np	np	--	np	np
D250	np	--	np	np	np	np	np	np	np	--	np	np
D251	nn	--	nn	nn	nn	nn	nn	nn	nn	--	nn	nn
D252	np	--	np	np	np	np	np	np	np	--	np	np
D253	np	--	np	np	np	np	np	np	np	--	np	np
D254	nn	--	nn	nn	nn	nn	nn	nn	nn	--	nn	nn
D255	np	--	np	np	np	np	np	np	np	--	np	np
D256	np	--	np	np	np	np	np	np	np	--	np	np
D257	np	--	np	np	np	np	np	np	np	--	np	np
D258	np	--	np	np	np	np	np	np	np	--	np	np
D259	nn	--	nn	nn	nn	nn	nn	nn	nn	--	nn	--
D260	np	--	np	np	np	np	np	np	np	--	np	nn
D261	nn	--	nn	np	np	np	np	np	np	--	np	np
D262	np	--	np	np	np	np	np	np	np	--	np	np
D263	np	--	np	np	np	np	np	np	np	--	np	np
D264	np	--	np	nn	nn	nn	nn	nn	nn	--	nn	nn
D265	np	--	np	np	np	np	np	np	--	--	np	nn
D266	np	--	np	np	np	np	np	np	np	--	np	np
D267	nn	--	nn	nn	nn	nn	nn	nn	nn	--	nn	nn
D268	nn	--	nn	nn	nn	nn	nn	nn	nn	--	nn	nn
D269	nn	--	nn	nn	nn	nn	nn	nn	nn	--	nn	nn
D270	nn	--	nn	nn	nn	nn	nn	nn	nn	--	nn	nn
D271	nn	--	nn	nn	nn	--	np	np	np	--	np	np
D272	nn	--	nn	nn	nn	nn	nn	nn	nn	--	nn	nn
D273	np	--	np	np	np	np	np	np	np	--	np	nn
D274	np	--	np	np	np	np	np	np	np	--	np	np
D275	nn	--	np	np	np	np	np	np	np	--	np	np
D276	np	--	np	np	np	np	np	np	np	--	np	nn
D277	nn	--	nn	nn	nn	nn	nn	nn	nn	--	nn	nn
D278	np	--	np	np	np	np	np	np	np	--	np	np
D279	np	--	np	np	np	np	np	np	np	--	np	np
D280	nn	--	nn	nn	nn	nn	nn	nn	nn	--	nn	nn
D281	nn	--	nn	nn	nn	nn	nn	nn	nn	--	np	np
D282	nn	--	nn	nn	nn	nn	nn	nn	nn	--	nn	nn
D283	nn	--	nn	nn	nn	nn	np	np	np	--	np	np
D284	nn	--	nn	nn	nn	nn	nn	nn	nn	--	nn	nn
D285	nn	--	nn	nn	nn	nn	nn	nn	nn	--	nn	nn
D286	nn	--	nn	nn	nn	nn	nn	nn	nn	--	nn	nn
D287	np	--	np	np	np	np	np	np	np	--	np	np
D288	np	--	np	np	np	np	np	np	np	--	np	nn
D289	nn	--	nn	nn	nn	nn	--	nn	nn	--	nn	nn
D290	nn	--	nn	nn	nn	nn	--	nn	nn	--	nn	nn
D291	nn	--	nn	nn	nn	nn	--	np	np	--	np	np
D292	nn	--	nn	nn	nn	nn	--	nn	nn	--	nn	nn
D293	nn	--	nn	nn	nn	nn	--	nn	nn	--	nn	nn
D294	np	--	nn	nn	nn	nn	--	nn	nn	--	nn	nn
D295	np	--	np	nn	nn	nn	--	nn	nn	--	nn	nn
D296	nn	--	np	np	np	np	--	np	np	--	np	np
D297	nn	--	nn	nn	nn	nn	--	nn	nn	--	nn	nn
D298	np	--	np	np	np	np	--	np	np	--	np	np
D299	nn	--	nn	nn	nn	nn	--	nn	nn	--	--	nn
D300	np	--	np	np	np	np	--	np	np	--	--	nn
D301	np	--	nn	nn	nn	nn	--	nn	nn	--	--	nn
D302	nn	--	nn	nn	nn	nn	--	nn	nn	--	nn	nn
D303	nn	--	nn	nn	nn	nn	--	nn	nn	--	--	nn
D304	--	--	--	np	np	np	--	np	np	--	--	--
D305	nn	--	--	nn	--	--	--	np	np	--	np	nn
D306	nn	--	nn	nn	nn	nn	--	nn	nn	--	nn	np
D307	nn	--	--	nn	nn	nn	--	np	np	--	np	np
