# Supplementary material for: The Evolution of Sex Ratio Distorter Suppression Affects a 25 cM Genomic Region in the Butterfly Hypolimnas bolina
Source: PLoS Genet. 2014 Dec 4;10(12):e1004822. doi: 10.1371/journal.pgen.1004822 (PMC4256269; doi:10.1371/journal.pgen.1004822)
Supplement: S7 Table — Genotypes for each individual used in the study, for the 12 suppressor-linked markers. Each SNP is denoted using the IUPAC code. Missing data occurred where the sequence was not scorable for that individual. (XLSX) [file pgen.1004822.s010.xlsx]

## Sheet: Sheet1
		Marker
Year	Sample	A	B	C	D	E	F	G	H	I	J	K	L
2001	2001_1	ATT	RTKTCCYC	TCG	CACCCTCCAC	TAAY	SWAYC	RTRW	WTTACGT	GTTC	RTRMRY	GTCC	GGSYYRW
2001	2001_2	ATT	ATTTMCCC	YCG	CAMCCTYCAC	TRAY	SWMCY	RTRW	missing data	GTTC	GTGAAT	GTCC	GGSYYRW
2001	2001_3	ATT	RKKTCCCC	CCG	CACCCTCCRY	TAAY	STAYC	GKRT	WTTACGT	GTTY	RTGARY	GTYC	GKSTYAW
2001	2001_4	ATY	RTKTCCYC	YCG	CRCCCTCCAC	TAWC	GTAYY	GTRT	ATTACGT	GTWT	GTGNRT	GTCC	GGCTTAW
2001	2001_5	ATT	RKKTCCCC	YYR	CAACCTCCAC	TAWY	SWAYC	RTRW	ATWACRY	GTTY	RTGARY	GTYC	GGCTTAW
2001	2001_6	ATT	RKKTCCCC	YCG	CAMCCTCCRY	TAAY	GTAYY	GTGT	ATTACGT	GTAT	RTGARY	GTYC	GKSTYAW
2001	2001_7	ATY	missing data	YCG	CAMCCTCYAC	TAWY	missing data	GKGT	WTTRCGT	GTTC	ATRMGC	GYYC	GGCTTAT
2001	2001_8	ATY	GKGTCCYC	YCG	CAMCCTCCAC	TAAY	missing data	RTRW	WTWAYGY	GTTY	GTGART	GTYC	GGSYYRW
2001	2001_9	WTT	RTKTCCYC	CCG	CAACCTCCAC	TAAT	GTMYY	RTRW	ATTACRY	GTTY	RTGARY	GTCC	GGSYYRW
2001	2001_10	ATT	RKKTMCCC	YCG	CAACCTCCAC	TAWY	CAACC	RKRW	ATWACRY	GTTY	RTGARY	GTYC	GGSYYRW
2001	2001_11	ATT	GKGYCCYM	TCG	CAMCCTCCAC	TATC	SWAYC	RTRW	ATWACRY	GTWY	RTRMRY	GTCC	GGGCCGA
2001	2001_12	ATT	RKKTMCCC	YCG	CAACCTCCAC	TAAT	SWACY	GKGT	WTTACGT	GTWY	ATACGC	GTYC	GGCTTAT
2001	2001_13	ATT	GKGTCCYC	YCG	CAMCCTYCAC	TRAY	SWMCY	GKGT	ATTACGT	GTAT	RTRMRY	GTYC	GGGYCGA
2001	2001_14	ATT	ATTTCCCC	CCG	CACCCTYCAC	TAAC	CWACC	RTRW	ATTACGT	GTTY	RTGARY	GTYC	GGGYCRA
2001	2001_15	ATT	GTGTCCTC	CCG	CAMCCTYCAC	TRAY	GTMYY	RTRW	ATWACRY	GTTY	RTGAGY	GTYC	GGSWYAW
2001	2001_16	WTT	RTKTCCYC	YCG	CAMCCTCCAC	TAWC	missing data	GKRT	WTTACGT	RTTY	ATGAGC	GTYC	GGSYYRW
2001	2001_17	ATT	GKGTCCYC	YCG	CAMCCTCCAC	TAAY	CAACC	ATAA	ATAACAC	GTTC	GTGAAT	GTCC	GGSYYRW
2001	2001_18	WTY	GKGTCCYC	CCG	CAMCCTCCRY	TAAC	GTATC	GKGT	ATTACGT	GTAT	GTGAAT	GTYC	GGSWYAW
2001	2001_19	WTT	GKGTCCYC	TCG	AACCCCCCAC	TAWC	GTAYY	RTRW	ATTRCGT	GTWY	RTRMRY	GYCC	GGCTTAW
2001	2001_20	WTY	RTKTCCYC	YCG	CAACCTCCAC	TAAY	GTAYY	ATAA	ATAACAC	GTTC	RTGARY	GTCC	GKSTYAA
2001	2001_21	ATT	RKKTMCCC	CCG	CAACCTCCAC	TAAY	CWACC	GTGT	ATWAYGY	GTTT	RTGAGY	GTCC	GKSTYAW
2001	2001_22	missing data	missing data	TCG	CAACCTCCAC	TAAY	CNACC	RTRW	ATWACRY	GTWY	ATRMNN	GTCC	GGGACAA
2001	2001_23	ATT	RTKTMCYC	CCG	CAMCCTCCAC	TAAY	GTATC	RTRW	ATTACGT	GTTY	RTGARY	GTCC	GGSYYRW
2001	2001_24	WTT	RKKTCCCC	YCG	CAACCTCCAC	TAWC	CWACC	GTAT	AWWAYGY	ATTT	RTRMGY	GTCC	GGSYYRA
2001	2001_25	ATT	GGGTCCCC	CCG	CAACCTCCAC	TAAY	STMCY	RTRW	ATWACRY	GTTC	RTRMGY	GTYC	GKSTYAA
2001	2001_26	ATT	RTKTCCYC	CCG	CRCCCTCCAC	TAWY	missing data	GTGT	WWWAYGY	GTTC	ATGAGC	GTYC	GKGYCRA
2001	2001_27	missing data	RKKTMCCC	TYR	CAACCTCCAC	TAAY	CWACC	GTGT	WTTACGT	GTWY	RTGARY	GTCC	GGSYYRW
2001	2001_28	ATY	RTKTMCYC	TCG	CAMCCTCCAC	TAWY	CAACC	GTGT	ATWAYGY	GTTT	GTGART	GTCC	GGSYYRW
2001	2001_29	WTT	GKGTCCYC	YYR	CRCCCTCCAC	TAAY	CWACC	RTRW	WTTRCGT	GTTC	RTRMRY	GTYC	GGCTTAW
2001	2001_30	ATT	GGGTCCCC	CCG	CAMCCTCCAC	TAAC	SWACY	RTRW	ATWACRY	GTTY	RTGARY	GTTC	GGCTTAW
2001	2001_31	ATT	GKGTCCYC	YCG	CAACCTCCAC	TAAY	STAYC	GTGT	ATTACGT	GTTY	RTGARY	GTCC	GGSYYRA
2001	2001_32	ATT	RKKTMCCC	YCG	CACCCTCCAC	TAAY	CTACC	RTAW	ATWACRY	GTTY	RTRMRY	GTCC	GTGTCAA
2001	2001_33	ATT	RKKYMCCM	YCG	MAMCCTCCAC	TAAY	SWAYC	GKGT	WTTRCGT	GTTC	GTGART	GTCY	GGSTYRW
2001	2001_34	WTT	GTGTCCTC	TCG	CAMCCTCCAC	TAWC	CTACC	ATAW	ATWACRY	RTTY	ATRMGC	GTYC	GKGYCRA
2001	2001_35	ATT	GKGTCCYC	CCG	CRMCCTCCAC	TAAC	CTACC	GTGT	ATTACGT	GTWT	ATACGC	GTCC	GGSYYRW
2001	2001_36	WTT	RKKTMCCC	YCG	CRCCCTYCAC	TRAY	SWMCY	ATAA	ATTRCGT	RTTY	GTGAAT	GTCC	GKSTYAA
2001	2001_37	ATT	GKGTCCYC	YCG	CACCCTYYAC	TAAY	CWACC	GTGT	ATTACGT	GTTT	ATGAGC	GTCC	GKGWCAA
2001	2001_38	ATT	RTKTCCYC	CCG	CAMCCTYCAC	TAWC	missing data	GTGT	ATTRCGT	GTTC	GTGART	GTYC	GGCTTAT
2001	2001_39	ATT	RTKTMCYC	TCG	CAMCCTCCAC	TRAC	missing data	RKRW	ATAAYRC	GTTY	GTGAAT	GTCY	GGSYYRW
2001	2001_40	WTT	GKGTCCYC	CCG	CAACCTCCAC	TAAY	missing data	GKGT	ATNRCRY	GTTC	ATRMNN	GTCC	GGSYYRW
2001	2001_41	WTT	RKKTMCCC	YCG	CACCCTYYAC	TAAT	CWACC	GKRT	ATWACRY	RTTY	GTGART	GTCC	GGCTTAW
2001	2001_42	ATT	GTGTCCTC	CCG	CAMCCTCYAC	TAAY	GTAYY	RKRW	WTWACRY	GTTC	RTRMGY	GTCC	GGCTTAW
2001	2001_43	ATT	RTKTCCYC	YCG	CACCCTCCRY	TAAC	CTACC	RKRW	ATWACRY	GTTY	ATGAGC	GTCC	GGSTYAW
2001	2001_44	ATT	ATTTACCC	YCG	CAACCTCCAC	KAAT	STAYC	RTRW	AWAAYRC	GTTC	RTGARY	GTCC	GGSWYAA
2001	2001_45	ATT	GKGTCCYC	YCG	CACCYTCYAC	TRAY	SWAYC	RTRW	ATTACGT	ATTT	RTRMRY	GTCN	GKSTYAA
2001	2001_46	ATT	RKKTCCCC	CCG	CAMCCTCCRY	TAAT	CAACC	GKGT	ATTACGT	GTAT	GTGAAT	GTCC	GGGYCGA
2001	2001_47	ATT	GTGTCCTC	CCG	CACCCTYCRY	TRWC	GTMCT	RKRW	ATAACAC	GTWY	RTGAGY	GTYC	GKGYCRA
2001	2001_48	ATT	RKKTCCCC	YCG	CACCCTTCAC	TAAT	CNACC	GTRT	ATTACGT	GTTT	ATGAGC	GTCC	GGSYYRW
2006	2006_1	AYT	ATTTASCC	YCG	CACYCTCCAC	TAAC	GTACC	GTRT	ATTRCGT	GWTY	GTGART	GTTC	GGSTYAW
2006	2006_2	ATT	RKKTMCCC	CCG	CACCCTCCRY	TAAC	GTACY	RKAW	ATTRCGT	GWTC	GTGAAT	GTCC	GGGWCAA
2006	2006_3	ATY	RKKYMSCM	YCG	CAMYCTCCAC	TAAC	GTACC	RKAW	ATWRCRY	GWTC	RTRMGY	GTYC	SGSTYAW
2006	2006_4	ATT	RTKTMCYC	CCG	CACCCTCCAC	TAAC	GTACC	RTAW	ATTRCGT	RWTY	RTGAGY	GTYC	GKSTYAA
2006	2006_5	ATT	ATTTASCC	YCG	CAMCCTCCAC	TAWC	GTAYC	GTGT	ATWRCRY	GTTC	RTRMGY	GYYC	SGGYCRA
2006	2006_6	WTT	RKKYMCCM	YCG	CACCCTCCAC	TAAC	STACC	GKGT	ATTACGT	GTWT	missing data	GTYC	GGSYYRW
2006	2006_7	ATT	GTGTCCTC	YCG	CACYCTYCAC	TRAY	STMCY	GKRT	ATNRCGT	GWTY	RTGAGY	GTTC	GGSYYRW
2006	2006_8	AYY	ATTTMCCC	YCG	CACYCTCCAC	TAAC	GTACC		ATTRCGT	GWTY	missing data	RTYC	GGGYCRA
2006	2006_9	AYT	ATTTACCC	CCG	CAMCCTCCAC	TAWC	SWACC	GKRT	ATTRCGT	GWTY	RTGAGY	GTYC	GGSYYRW
2006	2006_10	AYT	GKGTCCYC	YCG	CACCCTCCAC	TAAC	STACC	GTRT	ATTRCGT	GWTY	RTGAGY	GTTC	GGCTTAT
2006	2006_11	missing data	ATTTCCCC	YCG	CRCCCTCCAC	TAAY	STACC	RTAW	ATWRCRY	GWTC	RTRMGY	GTYC	GKGYCRA
2006	2006_12	missing data	RTKTMCYC	CCG	CAMCYTCCAC	TAAC	SWACY	RTRW	ATWAYGY	GTTY	RTGARY	GTCC	GKSTYAW
2006	2006_13	ATT	GTGTCCTC	CCG	CACCCTCCAC	TAAC	GTACC	GTAT	ATTGCGT	GATC	GTGAGT	GTTC	GGCTTAT
2006	2006_14	ATT	RTKTCCYC	YCG	CAMCCTCCAC	TAWC	GTAYY	RKRW	WTTRCGT	GTTC	GTGAAT	GTCY	GKSTYAW
2006	2006_15	ATT	ATTTAGCC	YCG	CAMYCTCCAC	TAAY	SWACC	GTRT	missing data	RWTY	RTRMGY	GTYC	GGGCCGA
2006	2006_16	ATT	RTKTCCYC	CCG	CACCCTYCAC	KAAY	STACC	GKRT	ATTRCGT	GWTY	RTGAGY	GTYC	GGSTYAA
2006	2006_17	AYT	RKTYMCCC	YYR	CAMCCTCCAC	TAWC	GTACC	RTAW	ATWRCRY	GWTC	GTGARY	GTYC	GGCTTAT
2006	2006_18	ACT	ATTTACCC	CCG	CACCCTCCAC	TAAC	GTACC	GTRT	ATTRCGT	GWWY	RTRMGY	GTYC	SGGWCAA
2006	2006_19	ATT	ATTTACCC	CCG	CACCCTCCAC	TAAC	GTACC	RKAW	ATTGCGT	GWTC	GTGAGT	GTTC	GKGYCRA
2006	2006_20	ATT	ATTTACCC	NCG	CAMCCTCCAC	KAAY	STACC	GTGT	WTTACGT	GTTC	RTRMRY	GTCC	GGSYYRW
2006	2006_21	AYT	RTKTMCYC	CCG	CAMCCTCCAC	TAAC	SWACC	GTRT	ATTGCGT	GWTC	RTGAGY	GTTC	GKGYCRA
2006	2006_22	WTY	ATTTACCC	CCG	CACCCTCCAC	TAAC	GTACC	GTRT	ATWRYGY	GWTY	GTGAGT	GTYC	GKGYCRA
2006	2006_23	ATT	RTKTMCYC	CCG	CAMCCTCCAC	TAWC	GTAYC	GKRT	ATWRYGY	GWTY	RTGAGY	GTYC	GGGCCGA
2006	2006_24	ATT	RTKTMCYC	CCG	CAMCCTCCAC	TAAY	GTAYC	GTRT	ATTRCGT	GWWY	RTGAGY	GTCC	GGGYCGA
2006	2006_25	missing data	missing data	CCG	missing data	TAAC	missing data	GTRT	missing data	NNNN	RTGARY	missing data	missing data
2006	2006_26	WYT	ATTTACCC	CCG	CACCCTCCAC	TAAC	STACC	GKRT	ATTACGT	RTWT	ATGAGC	GTYC	GGSYYRW
2006	2006_27	WTT	RKKYMCCM	CCG	CACYCTCCAC	TAAC	GTACC	RKRW	ATWACRY	GTTY	RTGAGY	GTCN	GGGMCRA
2006	2006_28	AYT	ATTTACCC	CCG	CACCCTCCAC	TAAC	SWACC	GKRT	AWWRYGY	RWTY	RTGAGY	GTYC	GKGYCRA
2006	2006_29	AYT	ATTTACCC	CCG	CACCCTCCAC	TAAC	GTACC	GKAT	ATTGCGT	GATC	GTGAGT	GTYC	GGSYYRA
2006	2006_30	AYT	ATTTASCC	YCG	CAMCCTCCAC	KAAY	GTAYC	GKGT	ATWAYGY	GTTT	RTGAGY	GTCC	GGGCCGA
2006	2006_31	WTT	ATTTMCCC	CCG	CACYCTCCAC	TAAC	STACC	GKGT	ATTACGT	GTWT	ATGAGC	GTCC	GKGYCRA
2006	2006_32	ATT	missing data	YCG	CANYCTCCAC	TAAC	missing data	GTRT	ATTRCGT	GWTY	GTGAGT	GTYC	GGSYYRA
2006	2006_33	WTT	ATTTACCC	CCG	CACCCTCCAC	TAAC	STACC	GKRT	ATTRCGT	GWWY	RTGAGY	GTYC	GKGYCRA
2006	2006_34	ATT	ATTTACCC	YCG	CACCCTCCAC	TAAC	GTACC	GKGT	AWWAYGY	GTWY	ATRMGC	GYCC	GKSTYAW
2006	2006_35	ATT	RTKTMCYC	YCG	CAMYCTCCAC	KAAY	STACC	GTGT	ATWAYGY	GTTT	GWGART	GYCC	GGSYYRW
2006	2006_36	AYT	ATTTACCC	CCG	CACCCTCCAC	TAAC	GTACC	GKAT	ATTGCGT	GATC	RTRMGY	GTCC	GGSYYRW
2006	2006_37	ATT	missing data	CCG	missing data	TAWC	GTACY	GKAT	ATTGCGT	GATC	GTGAGT	GTYC	GGSYYRW
2006	2006_38	ATT	ATTTASCC	YCG	CACYCTCYAC	TAWC	SWACC	GKGT	ATWAYGY	GTTT	RWGAGY	RTCC	GGSYYRW
2006	2006_39	AYT	ATTTACCC	CCG	CACCCTCCAC	TAAY	SWACC	GKRT	ATTRCGT	GWWY	GTGART	GTYY	GKSTYAW
2006	2006_40	AYT	ATTTMCCC	CCG	CAMCCTCCAC	TAWC	SWACC	GKRT	WTTRCGT	GWTC	RTRMGY	GTYN	GGCTTAT
2006	2006_41	AYT	RTKTMCYC	CCG	CACCCTCCAC	TAAC	GTACC	GKRT	WTTRCGT	GWTC	RTRMGY	GTYN	GGSTYAW
2006	2006_42	ATT	ATTTACCC	CCG	CACCCTCCAC	TAAC	GTACC	GKAT	ATTGCGT	GATC	GTGAGT	GTTC	GGCTTAA
2006	2006_43	AYT	RKKYMCCM	YCG	CAMCCTYCAC	TRAY	STMCY	RKRW	WTTACGT	GTTC	ATRMGC	GTYC	GGCTTAT
2006	2006_44	ATT	ATTTACCC	CCG	CACCCTCCAC	TAAC	GTACC	GKAT	ATTGCGT	GATC	GTGAGT	GTTC	GGSYYRW
2006	2006_45	ATT	ATTTACCC	YCG	MRCCCTCCAC	TAAT	SWAYC	GKGT	WTTACGT	GTTY	RTNNNN	GYCC	GGSTYAW
2006	2006_46	missing data	RTKTMCYC	CCG	CACCCTCCAC	TAAC	GTACC	GKAT	ATTRCGT	GWTY	GTGART	GTYC	SGGWCAA
2006	2006_47	ATT	RKKTMCCC	CCG	CAMCCTCCAC	TAAY	GTACY	RKAW	ATWRCRY	GWTC	RTGAGY	GTYC	GGCTTAW
2006	2006_48	ATT	RKKTMCCC	CCG	CACCCTCNAC	TAWC	SWACC	RKAW	ATWRCRY	GWTC	RTRMGY	GTYC	GKSTYAW
2010	2010_1	missing data	ATTTASCC	YCG	CACCCTCCRY	TAAC	SWACC	GTGT	missing data	GTWT	RTGARY	GTTC	SGGTCAA
2010	2010_2	TTT	RTKTMCYC	CCG	CAMCCTCCAC	TAAY	SWACY	GTRT	ATTRCGT	GWTY	RTRMGY	GYCC	GGSTYAW
2010	2010_3	AYT	RKKTMCCC	CCG	CACCCTCCAC	TAAC	GTACC	GTGT	WTTACGT	GTWY	RTRMRY	GYYC	GGSYYRW
2010	2010_4	AYT	RTKTMCYC	CCG	CACCCTCCAC	TAAC	GTACC	GTGT	ATWACRY	GTWY	GTGAAT	GTYC	GGSYYRW
2010	2010_5	ATT	ATTTASCC	YCG	CAMCCTCCAC	TAAY	GTAYC	GTRT	ATWRCRY	GWTC	GTGAGT	GTTC	SKGTCAA
2010	2010_6	ATT	RTKTMSYC	TCG	CACCCTCCRY	missing data	SWACC	RTRW	ATWAYGY	GTTY	RTRMRY	GTTC	GGSWYAA
2010	2010_7	ATT	RTKTMSYC	TCG	CAMCCTCCAC	TAWC	GTAYC	RTRW	ATWACRY	GTTC	RTRMGY	GTTC	SGGWCAA
2010	2010_8	ATT	ATTTASCC	CCG	CACCCTCCAC	TAWC	STACC	GTRT	AWWRYGT	GWTC	RTGAGY	GTCC	SKGTCAA
2010	2010_9	missing data	ATTTACCC	CCG	CACYCTCCAC	TRAC	GTMCY	RTAW	ATWRCRY	GWTC	GTGART	GYCC	GKGTCAA
2010	2010_10	AYT	ATTTMCCC	YCG	CACYCTCCAC	TAAC	GTACC	RTRW	ATTACGT	GTWY	GTGAAT	GYCC	GKSTYAW
2010	2010_11	ATT	ATTTASCC	YCG	CACYCTCCAC	TAAC	GTACC	RTRW	ATWACRY	GTTY	GTGAGT	GTYC	GKSTYAW
2010	2010_12	ATT	RKKTMCCC	YCG	CACCCTCCAC	TAAC	GTACC	GTGT	ATTACGT	GTTY	GTGAAT	GYYC	SGSTYAW
2010	2010_13	ATT	missing data	CCG	CACCCTYCAC	TRAC	GTMCY	RTRW	AWAAYRY	GTTC	RTGARY	GTCC	GKGTCAA
2010	2010_14	ATT	RKKYMCCM	CCG	CACCCTCCAC	TAAC	GTACC	GTAT	ATTGCGT	GATC	GTGAGT	GTTC	GGCTTAT
2010	2010_15	AYT	RKKYMCCM	TCG	CACTCTCCAC	TAAC	GTACC	RTRW	ATWACRY	GTTY	GTGART	GTYC	GGGCCGA
2010	2010_16	ATT	missing data	TCG	CAMYCTCCAC	TAWC	GTAYC	RTRW	ATWACRY	RTTY	RTRMGY	GTYC	GGSTYAA
2010	2010_17	missing data	ATTTACCC	YCG	CAACCTCCAC	missing data	STACY	RTAW	ATTRCGT	RWTY	RTRMG?	GTTC	GGSYYRW
2010	2010_18	AYT	ATTTASCC	YCG	CACCCTCCAC	TAAC	GTACC	RTAW	ATWRCRY	GWTY	RTGAGY	GTTC	GGGYCRA
2010	2010_19	WTT	RTKTMSYC	YCG	CACTCTCCAC	TAAC	GTAYC	GTGT	WTTACGT	GTTY	GWGART	GTYC	missing data
2010	2010_20	WTT	ATTTASCC	YCG	CACTCTCCAC	TAAC	GTACC	GTGT	ATTACGT	GTTT	GAGAGT	GYYC	GGGCCGA
2010	2010_21	ATT	ATTTASCC	YCG	CAMCCTCCAC	TAWC	GTAYC	GTRT	ATWRCRY	GWTY	missing data	GTTC	missing data
2010	2010_22	ATT	RTKTMCYC	CCG	MACYCTCCAC	TAAY	STACC	RTAW	ATTRCGT	GWTC	RTRMGY	GTCC	GKGYCRA
2010	2010_23	AYT	missing data	CCG	CAMCCTCCAC	TAAY	GTACY	RTRW	ATWACRY	GTTY	RTRMGN	GTCC	GGGCCGA
2010	2010_24	WYT	RKKTMSCC	YCG	CAMCCTCCAC	missing data	SWACC	ATRT	AWWACGT	ATTT	ATGAGC	RTYC	missing data
2010	2010_25	ATT	ATTTACCC	YCG	CACYCTCCAC	TAAC	GTACC	RTRW	ATTACGT	GTTY	RTGAGY	GTCC	GGCTTAT
2010	2010_26	AYT	GGGTCCCC	CCG	CAMCCTCCAC	missing data	missing data	RTRW	ATWAYGY	GWTY	RTGARY	GTYC	GGGCCGA
2010	2010_27	WTT	ATTTACCC	CCG	CACCCTCCAC	missing data	missing data	RTRW	ATWAYGY	RTTT	RTGARY	GTYC	GGGYCRA
2010	2010_28	WTT	ATTTMSCC	YCG	CAMCCTCCAC	missing data	missing data	GTRT	ATWRCRY	GWTT	GTGART	GTCC	GGGCCGA
2010	2010_29	ATT	ATTTMCCC	CCG	CACCCTCCAC	missing data	missing data	GTRT	ATTRCGT	GWTT	RTGAGY	GTYC	GKGYCRA
2010	2010_30	ATT	RTKTMCYC	CCG	CAMCCTCCAC	missing data	missing data	RTRW	ATWRCRY	GTTT	RTGARY	GTCC	GKGYCRA
2010	2010_31	AYT	RTKTMSYC	YCG	CACTCTCCAC	missing data	GTAYC	GTGT	WTTACGT	GTTY	GWGART	GTYC	SGSTYAW
2010	2010_32	WYT	ATTTASCC	YCG	CAMCCTCCAC	TAWC	GTAYC	GTRT	WTWRCRY	GWTC	GTGART	GTYC	SGSTYAW
2010	2010_33	ATT	RKKTMCCC	CCG	CACYCTCCAC	TAAY	GTACC	GTRT	AWWRYGT	GWTC	GTGART	GTYC	GGSYYRA
2010	2010_34	AYT	ATTTASCC	CCG	CACCCTCCAC	TAAC	GTAYC	GTRT	WTTRCGT	GWTC	ATGAGC	GTYC	GGSYYRW
2010	2010_35	AYT	RTKTCCYC	YCG	CACCCTCCAC	TAAY	GTMCY	GTGT	ATWACRY	GTAT	RTGARY	GTTC	GGGCCGA
2010	2010_36	AYT	ATTTACCC	YCG	CACCCTCCAC	TRAC	missing data	RTRW	ATWACRY	GTTC	RTRMRY	GTCC	GGSYYRW
2010	2010_37	AYT	missing data	YCG	CAMCCTCCAC	TAAC	GTACC	RTAW	ATWRCRY	GWTC	GTGAAT	GTCC	GGSYYRW
2010	2010_38	ATT	ATTTACCC	CCG	CAMCCTCNNN	TAAY	SWACC	GTRT	ATWRYGY	GWTY	GTGART	GTTC	GKSTYAA
2010	2010_39	WTT	missing data	YCG	CAMCCTCCAC	TAWC	STAYC	GTGT	WTWACRY	GTTC	GTGART	GTCC	SGGYCRA
2010	2010_40	ATT	ATTTACCC	YCG	CACYCTCCAC	TAAC	GTACC	GTRT	ATTRCGT	GWTY	RTRMRY	RTCC	GGGMCRA
2010	2010_41	missing data	missing data	TCG	missing data	TAWC	GTAYC	RTAW	ATWACRY	GTTY	GTGART	GTYC	GKGYCRA
2010	2010_42	ATT	ATTTASCC	YCG	missing data	TAAC	GTACC	GTRT	WTTRCGT	GWWY	GTGAGT	GTYC	GGCTTAT
2010	2010_43	ATT	ATTTASCC	YCG	missing data	TAAC	GTACC	GTRT	ATWRYGY	GWTY	GTGAGT	GTTC	GGCTTAT
2010	2010_44	ATT	missing data	YCG	missing data	missing data	GTACC	GTRT	WTTRCGT	GWTC	GTGAGT	GTYC	GGSTYAW
2010	2010_45	WTT	ATTTASCC	YCG	missing data	TAAC	GTACC	RTRW	WTWACRY	GTTC	RTGARY	GTYC	GGSYYRW
2010	2010_46	AYT	ATTTACCC	CCG	missing data	TAAC	GTACC	GTGT	ATTACGT	GTWT	RTGARY	GTYC	GGSWYAW
